# Supplementary material for: Bacterial community in African catfish (Clarias gariepinus) recirculating aquaculture systems under different stocking densities
Source: Frontiers journal article supplement (doi:10.3389/fmars.2023.1073250), 2023-01-26
Supplement: Data_Sheet_1.docx [file Data_Sheet_1.docx]

Supplementary Material

# Supplementary Figures


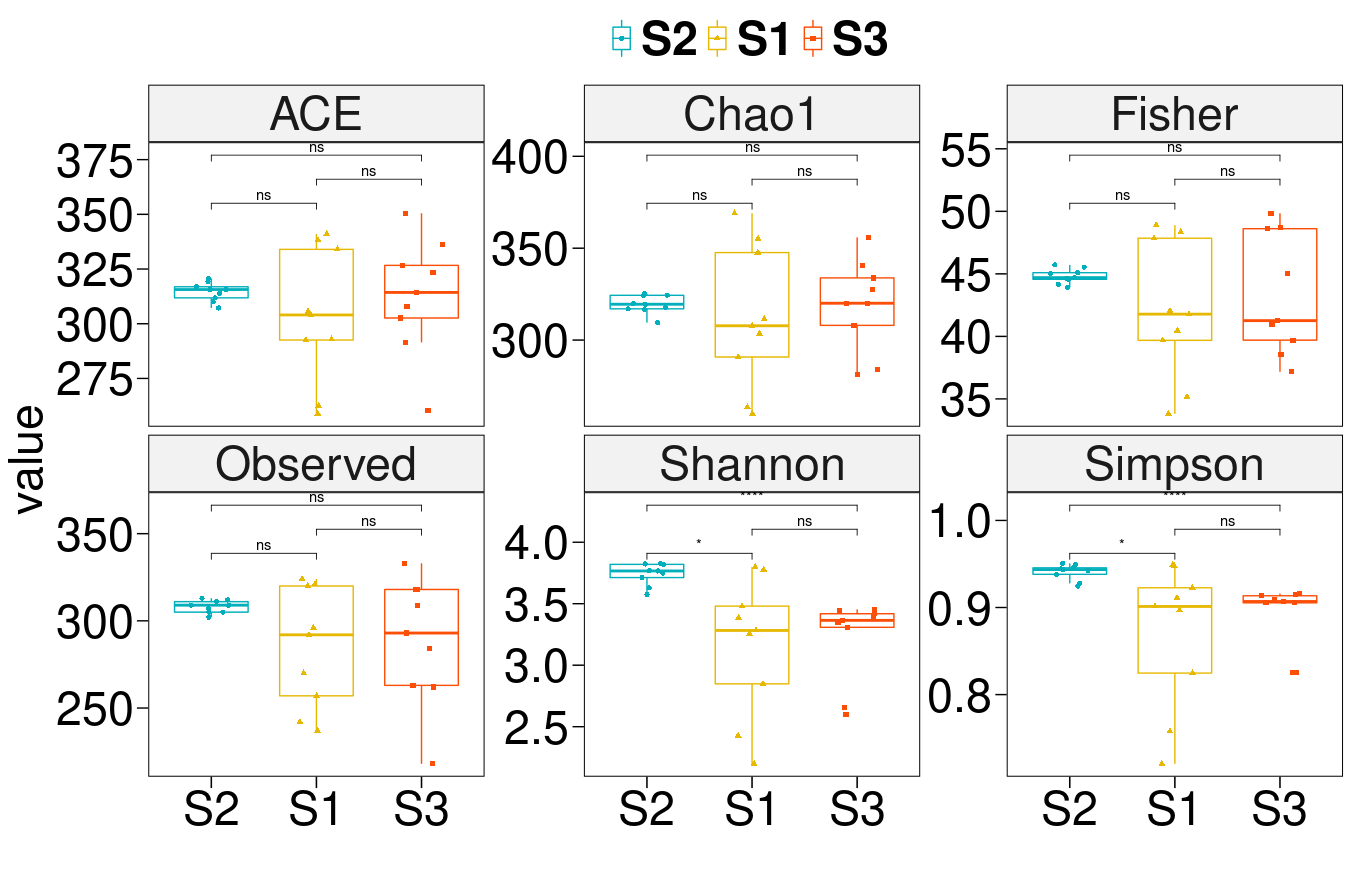


**Supplementary Figure 1.** Shannon alpha-diversity index accounting for species abundance and

evenness of distribution across RAS systems (intensive, semi-intensive and extensive). Black points indicate the mean. The statistical significance is represented with * (P-value ≤ 0.05) and **** (P- 675 value ≤ 0.0001). Non significance is expressed as “ns”.
