# Supplementary material for: Bacterial community in African catfish (Clarias gariepinus) recirculating aquaculture systems under different stocking densities
Source: Frontiers journal article supplement (doi:10.3389/fmars.2023.1073250), 2023-01-26
Supplement: Table_1.XLSX [file Table_1.XLSX]

## Sheet: Tabelle2
	A1: semi-intensive system								A2: intensive system								A3: extensive system
Datum	Fish biomass per RAS (kg)	Average stocking density per RAS water volume (kg/m3)	Average stocking density per production volume (kg/m3)	O2 (mg/L)	O2 (%)	pH	EC (µS/cm)	EC (mS/cm)	Fish biomass per RAS (kg)	Average stocking density per RAS water volume (kg/m3)	Average stocking density per production volume (kg/m3)	O2 (mg/L)	O2 (%)	pH	EC (µS/cm)	EC (mS/cm)	Fish biomass per RAS (kg)	Average stocking density per RAS water volume (kg/m3)	Average stocking density per production volume (kg/m3)	O2 (mg/L)	O2 (%)	pH	EC (µS/cm)	EC (mS/cm)		RAS Volume (m3)
2018-06-01	718.374	47.5744	66.5161	6.75	84.9	6.08	1966	1.966	901.03	53.3154	83.4287	5.9	74.9	4.86	1926	1.926	229.184	16.4881	21.2207	7.49	94.9	7.08	1174	1.174		S2: semi-intensive	15.1
2018-06-02	721.074	47.7532	66.7661	7.06	87.9	4.87	2004	2.004	905.674	53.5902	83.8587	5.86	75.1	5.33	2022	2.022	230.354	16.5722	21.3291	7.41	94.2	6.99	1187	1.187		S1: intensive	16.9
2018-06-03	723.874	47.9387	67.0254	7.19	89.3	5.56	2063	2.063	910.443	53.8724	84.3003	6.63	80.2	4.04	2135	2.135	231.594	16.6614	21.4439	7.59	95.3	6.77	1194	1.194		S3: extensive	13.9
2018-06-04	726.592	48.1187	67.277	7.25	91	4.6	2122	2.122	915.132	54.1498	84.7344	5.69	72.2	5.89	2071	2.071	231.725	16.6709	21.456	7.53	95.3	6.75	1206	1.206
2018-06-05	729.304	48.2983	67.5281	6.62	83.1	6.26	2180	2.18	919.829	54.4278	85.1694	6.06	77.5	5.27	2126	2.126	232.901	16.7555	21.5649	7.51	95.2	6.53	1223	1.223
2018-06-06	732.027	48.4786	67.7803	6.21	78.1	5.3	2230	2.23	924.548	54.707	85.6063	5.85	73.3	5.8	2188	2.188	234.077	16.8401	21.6738	7.59	95.2	6.25	1233	1.233		Tank Volume (m3)	1.2
2018-06-07	734.747	48.6587	68.0321	6.35	79.7	6.33	2280	2.28	924.548	54.707	85.6063	6.76	83.8	4.91	2210	2.21	235.24	16.9237	21.7815	7.64	95.8	5.72	1252	1.252
2018-06-08	737.474	48.8393	68.2846	6.91	85.7	5.67	2330	2.33	924.548	54.707	85.6063	7.36	90.8	4.48	2085	2.085	236.389	17.0064	21.8879	7.53	95.2	6.9	1170	1.17			.
2018-06-09	740.205	49.0202	68.5375	6.91	87.1	4.49	2230	2.23	929.231	54.9841	86.0399	6.8	86	6.97	2085	2.085	237.523	17.088	21.9929	6.73	86.4	6.86	1197	1.197
2018-06-10	742.968	49.2032	68.7933	6.61	84	6.65	2310	2.31	933.865	55.2583	86.469	6.69	86.2	6.53	2162	2.162	238.644	17.1686	22.0967	7.04	90.6	6.56	1205	1.205
2018-06-11	745.713	49.385	69.0475	6.83	86.6	6.36	2330	2.33	938.462	55.5303	86.8946	6.38	82.5	5.3	2199	2.199	239.754	17.2485	22.1994	7.45	94.9	6.3	1208	1.208
2018-06-12	748.455	49.5666	69.3014	6.79	85.9	6	2380	2.38	938.462	55.5303	86.8946	6.73	85	6.6	2230	2.23	239.754	17.2485	22.1994	7.45	95.7	6.2	1236	1.236
2018-06-13	751.202	49.7485	69.5557	6.79	85	4.52	2420	2.42	934.605	55.3021	86.5375	6.49	80.5	6.91	1658	1.658	239.241	17.2116	22.1519	7.5	95.5	7.3	1076	1.076
2018-06-14	753.956	49.9309	69.8107	6.72	84.6	6.57	2500	2.5	939.087	55.5673	86.9525	6.6	81.2	6.88	1668	1.668	240.336	17.2904	22.2533	7.57	95.3	7.41	1077	1.077
2018-06-15	756.707	50.113	70.0655	6.77	84.3	6.49	2280	2.28	943.516	55.8293	87.3626	6.52	80.5	6.87	1536	1.536	241.419	17.3683	22.3536	7.5	94.6	7.65	1008	1.008
2018-06-16	759.322	50.2862	70.3076	6.93	87.1	6.13	2320	2.32	947.89	56.0882	87.7676	6.62	82.8	6.43	1596	1.596	242.499	17.446	22.4536	7.64	96.8	7.27	1022	1.022
2018-06-17	762.138	50.4727	70.5683	6.84	85.7	5.07	2360	2.36	952.257	56.3466	88.1719	6.31	79.8	5.72	1640	1.64	243.584	17.524	22.5541	7.51	95.4	7.39	1033	1.033
2018-06-18	764.96	50.6596	70.8296	6.83	85.1	4.32	2400	2.4	956.566	56.6015	88.5709	6.38	80.1	4.44	1704	1.704	244.695	17.604	22.6569	7.44	94	7.25	1044	1.044
2018-06-19	767.733	50.8432	71.0864	6.56	81.9	5.39	2460	2.46	960.782	56.851	88.9613	6.25	78	4.48	1790	1.79	245.751	17.6799	22.7547	7.34	92.9	7.12	1056	1.056
2018-06-20	770.496	51.0262	71.3422	6.44	80.2	6.64	2310	2.31	964.947	57.0975	89.3469	6.13	76.1	5.85	1839	1.839	246.795	17.755	22.8514	7.45	94.5	7.18	1074	1.074
2018-06-21	773.272	51.2101	71.5993	6.34	80.2	6.16	2350	2.35	969.062	57.3409	89.728	6.17	77.5	3.99	1946	1.946	247.559	17.81	22.9221	7.32	93.2	6.86	1068	1.068
2018-06-22	776.049	51.394	71.8564	6.07	76	6.38	2220	2.22	973.136	57.582	90.1052	6.42	78.9	6.78	1747	1.747	248.604	17.8852	23.0189	5.3	67.5	6.86	1033	1.033
2018-06-23	778.831	51.5782	72.114	6.3	79	4.84	2280	2.28	977.163	57.8203	90.4781	6.43	78.3	6.19	1799	1.799	249.645	17.9601	23.1153	7.23	91.3	7.2	1054	1.054
2018-06-24	781.632	51.7637	72.3733	6.68	83.8	6.22	2340	2.34	981.181	58.058	90.8501	6.76	82.3	5.16	1344	1.344	250.705	18.0363	23.2134	6.58	84.3	7.04	1074	1.074
2018-06-25	784.428	51.9489	72.6322	6.74	83.6	4.96	2380	2.38	985.2	58.2959	91.2222	6.16	76.1	5.36	1899	1.899	251.761	18.1123	23.3112	7.32	92.2	6.74	1070	1.07
2018-06-26	787.216	52.1335	72.8904	6.39	79.2	6.3	2450	2.45	989.22	58.5337	91.5944	6.34	77.1	5.77	1979	1.979	252.809	18.1877	23.4082	7.39	92.5	6.74	1087	1.087
2018-06-27	790.011	52.3186	73.1492	6.68	83	6.07	2500	2.5	993.253	58.7724	91.9679	6.14	75.3	5.55	1935	1.935	253.857	18.2631	23.5053	7.45	92.5	6.47	1083	1.083
2018-06-28	792.808	52.5038	73.4081	6.73	83.6	4.78	2540	2.54	995.931	58.9308	92.2158	6.24	77.2	4.87	1992	1.992	254.905	18.3385	23.6023	7.36	91.5	6.08	1096	1.096
2018-06-29	795.613	52.6896	73.6679	6.67	83.3	4.86	2400	2.4	999.984	59.1707	92.5911	5.96	74	5.1	1894	1.894	255.96	18.4144	23.7	7.27	91.7	6.64	1068	1.068
2018-06-30	798.416	52.8752	73.9274	6.6	82.7	6.61	2430	2.43	1004.04	59.4105	92.9664	6.39	79.3	4.77	1983	1.983	257.018	18.4905	23.798	7.31	92.6	6.69	1085	1.085
2018-07-01	801.235	53.0619	74.1884	6.02	75.3	6.25	2360	2.36	1008.13	59.6527	93.3455	6.01	75.2	6.25	2004	2.004	258.086	18.5673	23.8969	7.27	91.4	6.1	1095	1.095
2018-07-02	804.063	53.2492	74.4503	6.52	81.7	5.63	2540	2.54	1012.23	59.895	93.7246	6.24	77.2	4.78	2080	2.08	259.173	18.6455	23.9975	7.25	90.5	5.36	1096	1.096
2018-07-03	806.878	53.4356	74.7109	6.33	79.6	4.64	2610	2.61	1016.31	60.1366	94.1027	6.58	82	4.67	2157	2.157	260.23	18.7216	24.0954	7.28	91.4	4.81	1122	1.122
2018-07-04	809.696	53.6223	74.9719	6.76	84.6	6.04	2670	2.67	1020.1	60.3608	94.4535	6.5	83.1	6.38	2130	2.13	261.29	18.7978	24.1935	7.24	91.8	6.91	1196	1.196
2018-07-05	812.515	53.8089	75.2329	6.44	85	4.52	2730	2.73	1024.2	60.6035	94.8332	6.84	85.7	4.72	2165	2.165	262.356	18.8745	24.2922	7.37	93.5	6.63	1205	1.205
2018-07-06	815.339	53.996	75.4944	6.51	81.9	6.77	2590	2.59	1027.39	60.7921	95.1283	6.73	82.8	7.3	1916	1.916	263.165	18.9327	24.3671	7.48	93.5	7.17	1214	1.214
2018-07-07	818.163	54.183	75.7558	6.77	84.6	6.48	2620	2.62	1031.5	61.0354	95.5091	6.93	86	7	1884	1.884	264.23	19.0094	24.4657	7.4	93	7	1229	1.229
2018-07-08	821.008	54.3714	76.0193	6.65	82.8	5.8	2670	2.67	1035.64	61.2805	95.8926	6.76	84.5	6.55	1929	1.929	265.322	19.0879	24.5669	7.33	91.9	6.53	1245	1.245
2018-07-09	823.864	54.5605	76.2837	6.5	81.7	4.55	2730	2.73	1039.81	61.527	96.2784	6.69	84.5	4.77	2010	2.01	266.466	19.1702	24.6728	7.35	92.7	6	1261	1.261
2018-07-10	826.703	54.7485	76.5466	5.97	75	5.99	2790	2.79	1043.94	61.7717	96.6613	6.3	78.3	6.12	2061	2.061	267.357	19.2343	24.7553	6.77	85.7	5.93	1288	1.288
2018-07-11	828.273	54.8525	76.6919	6.69	83.5	4.89	2840	2.84	1046.67	61.9334	96.9143	6.66	83.6	4.11	2164	2.164	268.429	19.3114	24.8545	7.43	93.3	4.81	1305	1.305
2018-07-12	831.112	55.0405	76.9548	6.44	80.8	6.26	2910	2.91	1050.83	62.1791	97.2988	6.3	79.3	5.65	2240	2.24	266.608	19.1804	24.6859	7.08	89.5	6.96	1379	1.379
2018-07-13	833.95	55.2285	77.2176	6.69	83.9	6.63	2670	2.67	1054.98	62.425	97.6836	6.24	78.6	6.54	2059	2.059	267.683	19.2578	24.7855	7.33	92.5	7.28	1330	1.33
2018-07-14	836.789	55.4165	77.4805	6.3	73.6	6.01	2710	2.71	1059.15	62.6717	98.0696	6.61	82.5	5.15	2104	2.104	268.749	19.3345	24.8842	7.29	92.1	7.37	1345	1.345
2018-07-15	839.635	55.605	77.744	6.79	85.1	4.64	2760	2.76	1063.33	62.919	98.4566	6.86	85.4	3.84	2220	2.22	269.82	19.4115	24.9833	7.42	93.7	6.77	1362	1.362
2018-07-16	842.476	55.7931	78.007	6.56	71.4	5.67	2840	2.84	1067.51	63.1664	98.8437	6.51	83.4	3.76	2350	2.35	270.888	19.4883	25.0822	7.33	93.8	6.78	1388	1.388
2018-07-17	845.387	55.9859	78.2766	6.26	79.2	4.52	2890	2.89	1071.77	63.4182	99.2377	5.96	79.4	4.1	2390	2.39	272.04	19.5712	25.1889	7.06	90.3	6.75	1384	1.384
2018-07-18	848.236	56.1746	78.5404	6.67	83.5	6.3	2950	2.95	1075.96	63.6666	99.6264	6.27	80.9	5.9	2470	2.47	273.116	19.6486	25.2885	7.4	94.1	6.87	1396	1.396
2018-07-19	851.09	56.3636	78.8046	6	75.1	5.51	3000	3	1080.17	63.9154	100.016	5.83	74.4	3.86	2600	2.6	274.191	19.726	25.3881	6.85	87.7	6.79	1409	1.409
2018-07-20	853.947	56.5528	79.0692	5.99	75.2	5.65	2790	2.79	1084.38	64.1647	100.406	6.11	79	6.84	2360	2.36	275.268	19.8035	25.4878	7.09	90	6.85	1425	1.425
2018-07-21	856.805	56.7421	79.3338	6.74	84.8	4.27	2860	2.86	1088.6	64.4144	100.797	6.63	82.8	6.63	2320	2.32	276.345	19.8809	25.5875	7.4	93.5	6.48	1443	1.443
2018-07-22	859.753	56.9373	79.6068	6.69	84.4	4.3	2900	2.9	1092.92	64.6699	101.196	6.42	80.3	5.98	2340	2.34	277.435	19.9594	25.6884	7.37	92.6	5.9	1445	1.445
2018-07-23	862.616	57.1269	79.8719	6.32	79.6	6.33	2980	2.98	1097.16	64.9205	101.589	6.2	78.6	5.07	2510	2.51	278.517	20.0372	25.7886	7.26	92.5	6.32	1500	1.5
2018-07-24	865.48	57.3166	80.137	6.14	77.1	5.7	2830	2.83	1101.4	65.1719	101.982	6.45	81.4	6.19	2550	2.55	279.6	20.1151	25.8889	7.19	91.1	5.66	1502	1.502
2018-07-25	868.346	57.5064	80.4024	6.62	84.4	4.47	3110	3.11	1105.66	65.4235	102.376	6.39	82.1	4.63	2690	2.69	280.685	20.1932	25.9894	7.42	94.5	5.06	1533	1.533
2018-07-26	871.224	57.697	80.6689	6.23	80.3	6.53	3170	3.17	1109.92	65.6756	102.77	6.12	79.4	6.26	2810	2.81	281.774	20.2715	26.0902	7.33	93.2	6.7	1581	1.581
2018-07-27	874.099	57.8874	80.9351	6.1	77.5	6.74	2940	2.94	1123.74	66.4936	104.05	6.02	78.1	5.61	2580	2.58	287.386	20.6753	26.6098	6.84	87.9	6.9	1504	1.504
2018-07-28	876.98	58.0781	81.2019	6.14	77.5	6.2	2950	2.95	1128.08	66.7504	104.452	6.189	7.85	6.31	2610	2.61	288.484	20.7542	26.7115	6.75	87.4	6.7	1512	1.512
2018-07-29	879.872	58.2697	81.4696	6.53	81.9	5.03	3000	3	1132.44	67.0081	104.855	6.51	81.9	4.58	2670	2.67	289.588	20.8337	26.8137	7.09	91.1	6.18	1524	1.524
2018-07-30	882.767	58.4614	81.7377	6.6	82.8	4.6	3060	3.06	1136.79	67.2659	105.259	6.35	80.7	5.28	2730	2.73	290.695	20.9133	26.9162	7.23	91.8	5.83	1533	1.533
2018-07-31	885.659	58.6529	82.0055	6.44	83.3	6.38	3150	3.15	1141.16	67.5242	105.663	6.51	83	5.96	2820	2.82	291.805	20.9932	27.019	7.35	93.7	6.99	1600	1.6
2018-08-01	888.563	58.8452	82.2744	6.74	85.2	5.02	3190	3.19	1145.53	67.783	106.068	6.66	86	4.2	2700	2.7	292.913	21.0729	27.1216	7.31	94	6.69	1643	1.643
2018-08-02	891.468	59.0376	82.5433	6.23	78.5	4.48	3123	3.123	1149.91	68.0421	106.473	6.34	79.5	5.05	3000	3	294.027	21.153	27.2247	7.07	90.3	6.89	1652	1.652
2018-08-03	894.388	59.231	82.8137	6.76	83.8	5.1	2860	2.86	1154.3	68.3015	106.879	6.83	84.4	4.23	3020	3.02	295.145	21.2335	27.3282	7.54	94.4	6.53	1639	1.639
2018-08-04	897.3	59.4238	83.0833	6.64	83.5	4.37	2930	2.93	1158.69	68.5617	107.286	6.1	77.3	5.31	2880	2.88	296.258	21.3135	27.4313	5.79	74.5	7.01	1533	1.533
2018-08-05	900.234	59.6181	83.355	6.75	84.5	4.84	2999	2.999	1163.1	68.8225	107.694	6.8	84.1	3.88	2980	2.98	297.401	21.3958	27.5371	7.44	95	6.5	1675	1.675
2018-08-06	903.165	59.8123	83.6264	6.62	82.3	4.83	3010	3.01	1167.52	69.0838	108.103	6.66	83.2	3.95	2960	2.96	298.534	21.4773	27.642	7.75	97.3	6.83	1533	1.533
2018-08-07	906.091	60.006	83.8973	6.96	86.9	4.51	3060	3.06	1171.94	69.3453	108.513	6.72	82.9	3.89	3040	3.04	299.656	21.558	27.7459	7.5	95.8	5.96	1329	1.329
2018-08-08	909.027	60.2005	84.1692	6.75	86	4.46	2880	2.88	1176.34	69.6056	108.92	6.15	77.9	5.62	2890	2.89	300.781	21.6389	27.8501	7.38	94.2	6.5	1565	1.565
2018-08-09	911.971	60.3954	84.4418	6.63	83	4.72	2920	2.92	1180.77	69.8683	109.331	6.3	78.9	4.13	3020	3.02	301.918	21.7207	27.9554	7.18	91	5.82	1592	1.592
2018-08-10	914.91	60.5901	84.7139	6.63	83.5	4.31	2740	2.74	1183.67	70.0394	109.599	6.17	78.3	5.99	2850	2.85	303.044	21.8017	28.0596	7.24	96.6	7.1	1479	1.479
2018-08-11	917.865	60.7858	84.9875	7.1	89.1	4.37	2790	2.79	1188.12	70.3028	110.011	6.71	83.8	3.94	2960	2.96	304.174	21.883	28.1643	7.51	95.2	6.77	1485	1.485
2018-08-12	920.814	60.9811	85.2606	6.71	84.6	6.57	2840	2.84	1192.57	70.566	110.423	6.54	82.2	6.57	3040	3.04	305.304	21.9643	28.2689	7.56	95.3	6.56	1504	1.504
2018-08-13	923.772	61.177	85.5344	6.65	83.7	4.62	2870	2.87	1197.02	70.8297	110.835	6.52	82.3	3.74	3090	3.09	301.238	21.6718	27.8924	7.19	93.2	5.98	1552	1.552
2018-08-14	926.734	61.3731	85.8087	6.85	86.4	4.75	2910	2.91	1201.48	71.0938	111.249	6.17	78.5	3.87	3180	3.18	302.371	21.7533	27.9973	7.18	94	5.55	1586	1.586
2018-08-15	929.691	61.5689	86.0825	6.9	86.7	4.56	2970	2.97	1205.96	71.3586	111.663	6.65	83	3.93	3260	3.26	303.5	21.8345	28.1019	7.38	95.7	5.17	1608	1.608
2018-08-16	932.67	61.7662	86.3583	6.57	82.3	4.35	3090	3.09	1210.44	71.6238	112.078	6.32	79.9	4.24	3330	3.33	304.635	21.9162	28.2069	7.03	90.2	4.62	1631	1.631
2018-08-17	935.649	61.9635	86.6342	6.38	79.8	5.68	2600	2.6	1214.91	71.8882	112.492	6.21	78.8	6.55	2780	2.78	305.771	21.9979	28.3121	6.7	84.7	6.37	1492	1.492
2018-08-18	938.623	62.1605	86.9095	6.77	84.9	4.38	2710	2.71	1219.41	72.1544	112.908	6.37	81.2	4.38	2890	2.89	306.911	22.0799	28.4177	7.04	90.5	4.3	1516	1.516
2018-08-19	941.602	62.3577	87.1854	6.65	83.4	4.2	2750	2.75	1223.92	72.421	113.325	6.3	80.5	4.4	2960	2.96	308.046	22.1616	28.5228	6.49	83.2	5.02	1574	1.574
2018-08-20	944.592	62.5558	87.4622	6.72	84.6	4.26	2780	2.78	1228.43	72.688	113.743	6.43	81.8	4.82	3010	3.01	309.201	22.2447	28.6297	7	89.7	4.34	1614	1.614
2018-08-21	947.586	62.754	87.7394	6.69	83.2	4.34	2840	2.84	1232.96	72.9561	114.163	6.42	80.7	4.65	3070	3.07	310.338	22.3265	28.735	6.93	88.7	6.31	1632	1.632
2018-08-22	950.576	62.9521	88.0163	6.59	82.3	4.69	2900	2.9	1237.49	73.224	114.582	6.62	82.4	4.35	3120	3.12	311.047	22.3775	28.8006	7.05	89.9	5.98	1642	1.642
2018-08-23	953.584	63.1513	88.2948	6.64	83.2	4.63	2970	2.97	1242.01	73.4917	115.001	6.59	82.9	4.05	3210	3.21	312.194	22.46	28.9069	7.07	90.6	5.02	1576	1.576
2018-08-24	956.574	63.3493	88.5717	6.8	86.1	4.11	3030	3.03	1246.54	73.7599	115.421	6.58	83.6	3.71	3050	3.05	313.332	22.5419	29.0122	7.24	92.2	6.73	1513	1.513
2018-08-25	959.582	63.5485	88.8502	6.82	85.8	4.33	3110	3.11	1251.08	74.0286	115.841	6.73	83.8	3.48	3130	3.13	314.479	22.6244	29.1184	7.08	90.6	6.82	1543	1.543
2018-08-26	959.582	63.5485	88.8502	6.35	79.8	4.14	3130	3.13	1253.03	74.1436	116.021	6.63	81.7	3.78	3090	3.09	314.479	22.6244	29.1184	6.84	87.3	6.34	1560	1.56
2018-08-27	962.609	63.7489	89.1305	6.67	84.4	4.08	3200	3.2	1257.58	74.4131	116.443	6.75	82.9	3.56	3170	3.17	315.65	22.7086	29.2269	7.18	91.2	4.37	1575	1.575
2018-08-28	965.628	63.9489	89.41	6.77	84.8	4.16	3290	3.29	1262.15	74.6832	116.865	7	85.7	3.47	3250	3.25	316.808	22.7919	29.3341	7.22	91.8	4.32	1618	1.618
2018-08-29	968.642	64.1485	89.6891	6.79	85	4.2	3290	3.29	1266.72	74.9537	117.289	6.94	85.1	3.67	3360	3.36	317.953	22.8743	29.4401	7.08	89.7	6.53	1651	1.651
2018-08-30	971.659	64.3483	89.9684	6.64	85.7	4.33	3330	3.33	1271.3	75.2246	117.713	6.76	83.9	3.57	3120	3.12	319.1	22.9568	29.5463	7.04	90.1	6.82	1561	1.561
2018-08-31	974.671	64.5477	90.2473	6.89	81	4.38	3380	3.38	1275.88	75.4958	118.137	6.82	84.3	3.26	3330	3.33	320.25	23.0396	29.6528	6.86	87.3	6.05	1567	1.567
2018-09-01	977.694	64.7479	90.5272	6.31	81	4.25	3450	3.45	1280.47	75.7673	118.562	6.55	80.1	3.23	3390	3.39	321.404	23.1226	29.7596	7.3	90.7	5.75	1587	1.587
2018-09-02	980.745	64.95	90.8097	6.58	81.9	4.75	3490	3.49	1285.09	76.0407	118.99	6.56	80.4	3.54	3370	3.37	322.596	23.2083	29.87	6.92	86.7	5.29	1603	1.603
2018-09-03	983.773	65.1505	91.0901	6.15	76.6	4.42	3540	3.54	1289.69	76.3133	119.416	6.1	74.5	5.36	3090	3.09	323.755	23.2917	29.9773	7.13	89.3	5	1627	1.627
2018-09-04	986.806	65.3514	91.3709	6.11	76.5	4.64	3490	3.49	1294.32	76.5872	119.845	6.46	80.2	3.82	3160	3.16	324.915	23.3752	30.0847	7.09	89.9	4.4	1613	1.613
2018-09-05	989.864	65.5539	91.6541	6.51	81	3.99	3540	3.54	1298.95	76.8612	120.274	6.54	81.2	5.38	3220	3.22	326.083	23.4592	30.1929	7.27	91.8	6.38	1632	1.632
2018-09-06	992.915	65.756	91.9366	6.26	78.4	4.05	3610	3.61	1303.58	77.1347	120.702	6.75	84.1	3.66	3340	3.34	327.246	23.5429	30.3006	7.18	91.3	5.92	1661	1.661
2018-09-07	995.924	65.9552	92.2152	6.14	77.2	4.64	3140	3.14	1306.53	77.3096	120.975	6.68	83.6	5.69	3040	3.04	328.407	23.6264	30.4081	7.11	91.2	6.5	1607	1.607
2018-09-08	998.973	66.1572	92.4975	6.51	81.1	4.19	3240	3.24	1311.19	77.5851	121.406	6.73	83.8	3.74	3160	3.16	329.574	23.7104	30.5161	7.39	92.7	5.73	1623	1.623
2018-09-09	1002.02	66.3591	92.7799	6.55	81.7	4.23	3376	3.376	1315.84	77.8601	121.837	6.69	82.6	4.25	3170	3.17	330.741	23.7943	30.6242	7.34	92.3	4.97	1655	1.655
2018-09-10	1005.08	66.5616	93.063	6.49	80.3	4.18	3360	3.36	1320.49	78.1357	122.268	6.75	83	5.73	3220	3.22	331.91	23.8784	30.7324	7.07	90.6	6.45	1704	1.704
2018-09-11	1008.14	66.7642	93.3463	6.52	80.7	6.54	3240	3.24	1325.16	78.4116	122.7	6.72	82.9	6.25	3310	3.31	333.079	23.9625	30.8406	6.66	84.6	5.87	1724	1.724
2018-09-12	1011.21	66.9674	93.6303	6.33	73.7	6.08	3240	3.24	1329.83	78.6884	123.133	6.87	85.2	4.65	3370	3.37	334.255	24.0471	30.9495	7.29	92.6	5.66	1721	1.721
2018-09-13	1014.27	67.1703	93.914	5.83	72.6	4.87	3210	3.21	1334.52	78.9656	123.567	6.7	82.1	5.54	3420	3.42	335.429	24.1316	31.0582	7.37	92.9	6.55	1759	1.759
2018-09-14	1017.34	67.3735	94.1981	5.75	71.2	6.6	2750	2.75	1337.48	79.1406	123.84	6.72	81.6	6.66	3150	3.15	336.606	24.2163	31.1672	7.3	92.3	6.97	1760	1.76
2018-09-15	1020.41	67.5767	94.4822	6.21	77.5	6.39	2800	2.8	1342.17	79.4183	124.275	7.05	86.5	4.26	3220	3.22	337.78	24.3007	31.2759	7.33	92.2	6.63	1688	1.688
2018-09-16	1023.48	67.7799	94.7664	5.93	73.5	6.34	2850	2.85	1346.87	79.6962	124.71	7	84.1	6.76	3270	3.27	338.959	24.3855	31.3851	7.34	92.3	6.6	1714	1.714
2018-09-17	1024.51	67.8483	94.8619	5.6	69.4	5.85	2910	2.91	1346.87	79.6962	124.71	6.84	83.2	5.3	3330	3.33	338.42	24.3468	31.3352	6.86	86.8	5.64	1733	1.733
2018-09-18	1027.58	68.0519	95.1467	5.95	73.7	4.92	2960	2.96	1351.58	79.9749	125.146	6.85	83.9	5.38	3400	3.4	337.848	24.3056	31.2822	7.16	91.2	4.75	1775	1.775
2018-09-19	1030.67	68.2561	95.4321	5.81	72	6.25	2750	2.75	1356.29	80.2539	125.583	6.7	82.7	4.48	3520	3.52	339.031	24.3907	31.3918	7.04	90.1	6.5	1830	1.83
2018-09-20	1033.74	68.4593	95.7162	5.68	70.8	5.96	2800	2.8	1360.99	80.5317	126.017	6.52	81.7	4.42	3610	3.61	340.193	24.4743	31.4994	7.12	96.9	6.32	1843	1.843
2018-09-21	1036.82	68.6638	96.0022	5.39	68.3	5.33	2600	2.6	1365.69	80.8104	126.453	6.47	81.3	4.27	3230	3.23	341.357	24.5581	31.6071	6.87	88.9	7.15	1550	1.55
2018-09-22	1039.9	68.8675	96.2869	5.43	68.2	6.24	2680	2.68	1370.4	81.089	126.889	6.66	81.8	6.07	3240	3.24	342.524	24.642	31.7152	7.15	90.8	5.76	1556	1.556
2018-09-23	1042.99	69.0721	96.573	5.71	71.1	5.4	2720	2.72	1375.13	81.3687	127.327	6.94	84.2	3.85	3310	3.31	343.586	24.7184	31.8135	7.31	92.5	6.83	1574	1.574
2018-09-24	1046.08	69.2768	96.8593	5.92	73.7	4.67	2800	2.8	1379.87	81.6491	127.766	6.92	82.5	3.82	3370	3.37	344.764	24.8032	31.9226	7.29	91.6	6.56	1586	1.586
2018-09-25	1048.12	69.4123	97.0486	6.17	75.8	5.81	2840	2.84	1382.42	81.8001	128.002	7.52	86.8	3.79	3270	3.27	345.415	24.85	31.9829	7.66	94.8	6.72	1610	1.61
2018-09-26	1050.18	69.5485	97.2391	5.94	73.4	5.89	2720	2.72	1384.97	81.951	128.238	7.43	85.6	6.37	3110	3.11	346.076	24.8976	32.0441	7.54	94.9	7.5	1574	1.574
2018-09-27	1052.24	69.6848	97.4297	6.01	74.8	6.49	2490	2.49	1387.53	82.1022	128.475	6.94	81.4	6.93	3030	3.03	346.733	24.9448	32.1049	7.44	93.5	7.27	1492	1.492
2018-09-28	1054.31	69.8215	97.6208	5.64	70.4	7.03	1973	1.973	1390.01	82.2491	128.705	6.7	80.1	6.87	2490	2.49	347.394	24.9924	32.1661	7.19	92.6	7.67	1090	1.09
2018-09-29	1056.36	69.9575	97.811	5.89	72.7	6.69	1824	1.824	1392.57	82.4007	128.942	7.24	85.1	7.47	2450	2.45	348.058	25.0401	32.2276	7.51	95.1	7.77	1098	1.098
2018-09-30	1057.84	70.0554	97.9478	5.51	68.6	6.43	1851	1.851	1395.14	82.5528	129.18	7.22	85	7.22	2450	2.45	348.718	25.0876	32.2887	7.39	94.7	7.68	1123	1.123
2018-10-01	1060.94	70.261	98.2353	5.02	63.4	5.85	1888	1.888	1130.76	72.0227	117.787	6.62	78.1	7.52	2460	2.46	360.748	25.9531	33.4026	7.1	91	7.46	1131	1.131
2018-10-02	1064.04	70.4664	98.5224	5.42	67.7	5.24	1940	1.94	607.266	45.6591	84.3425	6.64	77.8	7.13	2470	2.47	158.331	15.3719	21.9904	7.44	95.2	7.69	1147	1.147
2018-10-03	1067.16	70.673	98.8113	6.53	81.3	4.88	1740	1.74	609.854	45.8537	84.7019	7.05	84.3	4.03	2298	2.298	159.006	15.4375	22.0842	7.8	95.7	7.32	1148	1.148
2018-10-04	1070.28	70.8797	99.1004	6.44	78.1	4.57	2067	2.067	612.453	46.0491	85.0629	7.29	84.6	6.83	2530	2.53	159.675	15.5024	22.1771	7.96	97.6	7.58	1162	1.162
2018-10-05	1073.39	71.0858	99.3884	6.21	76.7	4.44	2155	2.155	615.07	46.2459	85.4264	7.13	84.9	6.51	2320	2.32	160.344	15.5674	22.27	7.66	96.8	7.27	1181	1.181
2018-10-06	1076.5	71.2917	99.6763	6.43	81.3	3.89	2220	2.22	617.701	46.4437	85.7918	7.31	87	6.06	2360	2.36	161.02	15.633	22.3639	7.55	96.2	7.47	1177	1.177
2018-10-07	1079.63	71.4988	99.9659	6.69	82.7	4.03	2290	2.29	620.314	46.6402	86.1547	7.33	87.2	4.72	2390	2.39	161.698	15.6988	22.4581	7.65	96	7.29	1192	1.192
2018-10-08	1082.76	71.7062	100.256	6.72	81.6	4.29	2320	2.32	622.941	46.8377	86.5196	7.42	86.3	6.54	2400	2.4	162.377	15.7648	22.5524	7.8	97.1	7.22	1214	1.214
2018-10-09	1085.88	71.9126	100.544	5.97	73.4	4.4	2380	2.38	625.554	47.0341	86.8825	7.24	85.5	5.96	2400	2.4	163.05	15.8301	22.6458	7.72	96.9	7.06	1219	1.219
2018-10-10	1089	72.1193	100.834	5.78	70.9	4.36	2450	2.45	628.181	47.2317	87.2474	7	82.3	6.75	2003	2.003	163.721	15.8952	22.739	7.29	92.7	7.16	1260	1.26
2018-10-11	1092.14	72.3272	101.124	6.29	79	4.06	2300	2.3	630.804	47.4289	87.6117	7.36	86.5	7	2069	2.069	164.411	15.9622	22.8349	7.44	95	7.13	1257	1.257
2018-10-12	1095.28	72.5354	101.415	5.98	73	4.46	2340	2.34	633.436	47.6268	87.9772	6.73	80.7	6.36	2087	2.087	165.093	16.0284	22.9296	7.39	93.1	6.96	1278	1.278
2018-10-13	1098.41	72.7426	101.705	6.08	78	4	2430	2.43	636.074	47.8251	88.3436	7.22	85.4	6.44	2145	2.145	165.771	16.0943	23.0237	7.43	94.7	6.91	1283	1.283
2018-10-14	1101.55	72.9505	101.996	6.24	77.9	4.36	2500	2.5	638.727	48.0246	88.7121	6.88	82.8	6.04	2172	2.172	166.454	16.1606	23.1186	6.63	82.5	6.31	1249	1.249
2018-10-15	1104.69	73.1584	102.286	6.48	79.4	4.11	2450	2.45	641.378	48.2239	89.0803	7.33	83.7	5.43	2183	2.183	167.132	16.2264	23.2128	7.57	94.2	6.54	1297	1.297
2018-10-16	1107.86	73.3679	102.579	6.76	78.8	4.18	2400	2.4	644.055	48.4252	89.4521	7.11	85.8	4.06	2220	2.22	167.826	16.2938	23.3092	7.47	95.1	5.93	1317	1.317
2018-10-17	1111	73.5762	102.87	7.25	84	4.13	2420	2.42	646.714	48.6251	89.8214	7.43	88.8	6.49	2270	2.27	168.509	16.3601	23.404	7.51	95.8	5.92	1340	1.34
2018-10-18	1114.15	73.785	103.162	7.04	84.9	5.68	2380	2.38	649.382	48.8257	90.1919	6.81	84	6.56	2153	2.153	169.196	16.4268	23.4994	7.27	91.2	6.46	1297	1.297
2018-10-19	1117.32	73.9945	103.455	6.61	81.9	3.89	2520	2.52	652.057	49.0268	90.5635	6.99	86.5	6.35	2188	2.188	169.886	16.4938	23.5953	7.14	93.4	6.73	1338	1.338
2018-10-20	1120.48	74.2041	103.748	7.2	86.7	4.01	2470	2.47	654.747	49.2291	90.9371	7.14	87.8	4.97	2210	2.21	170.579	16.5611	23.6915	7.81	96.5	6.22	1271	1.271
2018-10-21	1123.67	74.415	104.043	7.37	88.5	4.03	2540	2.54	657.446	49.432	91.3119	7.06	86.9	6.44	2270	2.27	171.263	16.6275	23.7865	7.81	96.7	5.32	1287	1.287
2018-10-22	1126.83	74.6247	104.336	6.58	81.5	4.65	2600	2.6	660.142	49.6347	91.6864	7.31	89	5	2300	2.3	171.954	16.6946	23.8825	7.88	97.6	4.86	1316	1.316
2018-10-23	1130	74.8346	104.63	7.25	87.4	4.14	2600	2.6	662.846	49.838	92.0619	7.22	88.8	6.65	2340	2.34	172.054	16.7043	23.8964	7.5	94.6	7.3	1372	1.372
2018-10-24	1133.17	75.0446	104.923	6.91	83.2	4.36	2670	2.67	665.544	50.0409	92.4367	7.1	87.8	4.31	2400	2.4	172.75	16.7718	23.9931	7.65	55.4	7.16	1405	1.405
2018-10-25	1136.34	75.2544	105.217	6.81	82.7	4.34	2710	2.71	668.256	50.2448	92.8133	6.96	87	6.96	2430	2.43	173.445	16.8393	24.0896	7	84.2	6.92	1517	1.517
2018-10-26	1139.52	75.4647	105.511	7.11	88.1	3.81	2510	2.51	670.966	50.4486	93.1897	6.67	84.5	6.46	2240	2.24	174.138	16.9066	24.1858	7.02	94.9	7.31	1429	1.429
2018-10-27	1142.7	75.6758	105.806	7.18	87.6	3.86	2530	2.53	673.697	50.6539	93.569	6.7	85.5	6.68	2260	2.26	174.841	16.9749	24.2835	6.99	94.8	7.07	1462	1.462
2018-10-28	1145.88	75.8863	106.1	7.05	84.8	4.81	2420	2.42	676.418	50.8585	93.9469	6.84	85.4	4.79	2320	2.32	175.54	17.0427	24.3806	7.65	96.4	6.79	1396	1.396
2018-10-29	1149.07	76.0974	106.395	7.15	85.4	4.02	2440	2.44	679.151	51.064	94.3265	6.63	83.6	6.76	2360	2.36	176.237	17.1104	24.4774	7.19	94.5	6.83	1467	1.467
2018-10-30	1152.25	76.3081	106.69	6.35	80.7	4.44	2430	2.43	681.88	51.2692	94.7056	6.65	84.7	6.39	2400	2.4	176.939	17.1785	24.5749	7.34	95	6.76	1393	1.393
2018-10-31	1155.44	76.5189	106.985	6.87	85.6	4.12	2530	2.53	683.99	51.4278	94.9986	6.98	86.4	4.36	2480	2.48	177.639	17.2465	24.6721	7.76	96.8	5.94	1404	1.404
2018-11-01	1158.62	76.7301	107.28	6.8	85.2	3.82	2600	2.6	686.113	51.5874	95.2935	6.79	85	5.72	2500	2.5	178.378	17.3183	24.7747	7.66	95.8	5.43	1427	1.427
2018-11-02	1161.82	76.9419	107.576	6.88	84.1	4.43	2440	2.44	688.862	51.7941	95.6753	7.24	90.1	7.43	2230	2.23	179.095	17.3879	24.8743	7.84	96.5	7.11	1338	1.338
2018-11-03	1165.03	77.1541	107.873	6.85	83.6	4.34	2340	2.34	691.614	52.0011	96.0575	7.45	91.6	7.03	2260	2.26	179.805	17.4568	24.9729	7.89	96.9	6.73	1353	1.353
2018-11-04	1168.22	77.3658	108.169	6.8	83.5	4.37	2400	2.4	694.372	52.2084	96.4406	7.42	91.7	5.65	2310	2.31	180.51	17.5252	25.0708	7.74	96.3	5.95	1372	1.372
2018-11-05	1171.43	77.5783	108.466	6.71	83.9	4.06	2500	2.5	697.132	52.4159	96.8239	5.99	75,0	6.47	2390	2.39	181.217	17.5939	25.169	7.48	92,9	4.99	1389	1.389
2018-11-06	1172.48	77.6479	108.563	6.33	79	4.57	2520	2.52	697.609	52.4518	96.8901	5.76	84,3	5.23	2440	2.44	182.265	17.6956	25.3146	7.31	91,4	4.78	1442	1.442
2018-11-07	1175.69	77.8599	108.86	6.57	82	4.13	2610	2.61	700.372	52.6595	97.2739	6.94	87.2	3.59	2570	2.57	182.973	17.7644	25.4129	7.4	93.6	6.74	1469	1.469
2018-11-08	1178.9	78.0725	109.157	6.39	79.8	4.25	2650	2.65	703.03	52.8594	97.6431	7.01	88,4	3.85	2580	2.58	183.677	17.8327	25.5107	7.78	96,1	6.73	1480	1.48
2018-11-09	1143.31	75.716	105.862	7.05	88	3.78	2710	2.71	705.805	53.068	98.0285	7.02	87	4	2280	2.28	184.386	17.9016	25.6092	7.77	96.7	8.07	1193	1.193
2018-11-10	1146.17	75.9051	106.127	6.61	82.8	4.13	2640	2.64	708.579	53.2766	98.4138	6.55	83	6.73	2320	2.32	185.095	17.9704	25.7076	7.57	95.1	7.48	1203	1.203
2018-11-11	1149.28	76.1113	106.415	6.98	87	3.61	2710	2.71	711.37	53.4865	98.8014	6.44	81.4	6.67	2330	2.33	185.812	18.04	25.8072	7.63	96.1	7.49	1217	1.217
2018-11-12	1152.4	76.3179	106.704	6.68	83.4	3.83	2590	2.59	712.703	53.5867	98.9865	6.77	84.4	7.59	2360	2.36	186.555	18.1121	25.9104	7.53	94.2	7.39	1233	1.233
2018-11-13	1155.52	76.5246	106.993	6.24	78	3.93	2620	2.62	715.496	53.7967	99.3744	6.88	85.3	7.05	2360	2.36	187.274	18.1819	26.0103	7.63	95.1	7.34	1238	1.238
2018-11-14	1158.65	76.7315	107.282	6.2	78	4.17	2500	2.5	718.294	54.0071	99.7631	6.88	84.8	4.68	2410	2.41	187.994	18.2518	26.1103	7.6	93.5	6.95	1250	1.25
2018-11-15	1161.77	76.9382	107.571	6.07	75.4	4.55	2370	2.37	721.093	54.2175	100.152	7.11	86.7	6.6	2470	2.47	188.711	18.3215	26.2099	7.63	94.8	7.03	1262	1.262
2018-11-16	1164.89	77.1454	107.861	6.89	82.8	4.15	2450	2.45	723.904	54.4289	100.542	7.22	87.8	7.81	2250	2.25	189.434	18.3917	26.3103	7.77	95.3	7.53	1198	1.198
2018-11-17	1168.03	77.3526	108.15	7.16	86.7	4.36	2530	2.53	726.717	54.6404	100.933	7.69	91.4	8.15	2090	2.09	190.158	18.4619	26.4108	7.85	96.1	7.16	1219	1.219
2018-11-18	1171.15	77.5597	108.44	7.25	88	4.09	2610	2.61	729.537	54.8524	101.325	7.38	89.6	7.79	2132	2.132	190.88	18.532	26.5111	7.89	97.7	7.18	1232	1.232
2018-11-19	1174.28	77.7669	108.73	7.16	87.5	4.04	2680	2.68	732.357	55.0644	101.716	6.86	84.8	6.24	2159	2.159	191.606	18.6025	26.6119	7.77	95.9	7.06	1247	1.247
2018-11-20	1177.42	77.9746	109.02	6.5	80	5.68	2720	2.72	735.189	55.2774	102.11	7.12	88	7.22	2053	2.053	192.329	18.6727	26.7124	7.95	98.1	7.17	1261	1.261
2018-11-21	1183.69	78.3901	109.601	5.37	66.7	6.03	2640	2.64	738.025	55.4906	102.503	6.91	85.5	5.75	2122	2.122	193.057	18.7434	26.8135	7.63	94.3	7.01	1267	1.267
2018-11-22	1189.95	78.8046	110.18	5.62	69.6	5.72	2760	2.76	740.867	55.7043	102.898	7.18	87.8	4.07	2188	2.188	193.786	18.8142	26.9147	7.85	97.1	6.72	1285	1.285
2018-11-23	1196.24	79.2211	110.763	5.55	68.1	5.3	2840	2.84	743.715	55.9184	103.294	5.43	66.8	7.37	1995	1.995	194.519	18.8853	27.0165	7.72	95.7	7.33	1231	1.231
2018-11-24	1199.39	79.4298	111.055	5.9	74.3	4.2	2960	2.96	746.568	56.1329	103.69	7.01	87.4	5.35	1944	1.944	195.254	18.9567	27.1186	7.71	96.6	7.26	1249	1.249
2018-11-25	1202.56	79.6395	111.348	5.61	70.6	3.77	3030	3.03	749.446	56.3493	104.09	7.06	87.4	3.78	2032	2.032	195.992	19.0283	27.2211	7.49	93.8	6.98	1267	1.267
2018-11-26	1205.72	79.8491	111.641	5.78	72.7	3.78	3120	3.12	752.319	56.5653	104.489	6.72	83	6.76	2062	2.062	196.736	19.1006	27.3244	7.49	93.6	6.89	1282	1.282
2018-11-27	1208.87	80.0577	111.933	5.57	68.9	4.59	3150	3.15	755.186	56.7809	104.887	6.64	81.8	6.78	2071	2.071	197.472	19.172	27.4267	7.55	93.5	7.03	1291	1.291
2018-11-28	1212.03	80.2666	112.225	6.03	73.5	4.04	3230	3.23	758.057	56.9968	105.286	6.85	84	5.12	2025	2.025	198.206	19.2433	27.5286	7.55	93.4	6.79	1311	1.311
2018-11-29	1215.19	80.4762	112.518	5.91	74.3	4	3330	3.33	760.934	57.2131	105.685	7.17	87.9	4.01	2130	2.13	198.944	19.315	27.6311	7.58	94.9	6.29	1319	1.319
2018-11-30	1218.35	80.6852	112.81	6.42	80.3	4.2	3150	3.15	763.818	57.4299	106.086	6.94	86.5	4.3	1953	1.953	199.682	19.3866	27.7336	7.72	96.4	7.71	1316	1.316
2018-12-01	1221.51	80.8946	113.103	7.02	87.8	3.86	3260	3.26	766.707	57.6471	106.487	7.08	86.9	6.5	2032	2.032	200.421	19.4583	27.8363	7.94	98.5	6.5	1293	1.293
2018-12-02	1224.69	81.1052	113.397	6.46	83	4.41	3330	3.33	769.611	57.8655	106.89	7.12	88.2	6.36	2096	2.096	201.186	19.5326	27.9425	7.67	98.8	6.26	1310	1.31
2018-12-03	1227.89	81.317	113.693	5.85	74.7	4.53	2880	2.88	772.52	58.0842	107.294	6.73	83.6	6.09	2118	2.118	201.965	19.6083	28.0507	7.49	95.2	6.29	1324	1.324
2018-12-04	1231.06	81.5268	113.987	6.18	77.7	4.11	3420	3.42	775.424	58.3026	107.698	6.65	83.5	4.1	2195	2.195	202.708	19.6804	28.1539	7.62	96.6	5.47	1339	1.339
2018-12-05	1234.23	81.7368	114.28	6.59	80	4.14	3480	3.48	778.331	58.5211	108.102	6.44	79.4	6.93	2230	2.23	203.453	19.7527	28.2574	7.63	94.8	5.46	1366	1.366
2018-12-06	1235.43	81.8168	114.392	6.31	79.3	4.12	3480	3.48	781.242	58.74	108.506	6.93	86.7	4.47	2290	2.29	204.202	19.8254	28.3614	7.84	97.5	4.75	1387	1.387
2018-12-07	1238.6	82.0268	114.686	6.47	81.5	4.85	2910	2.91	784.155	58.959	108.91	6.43	81.3	7.02	1924	1.924	204.946	19.8977	28.4647	7.64	95.8	7.09	1231	1.231
2018-12-08	1241.77	82.2364	114.979	6.58	85	3.68	3050	3.05	787.079	59.1789	109.317	6.3	80.6	3.9	2169	2.169	205.693	19.9702	28.5685	7.3	93.6	6.16	1254	1.254
2018-12-09	1244.94	82.446	115.272	6.53	84.1	3.87	3100	3.1	790.018	59.3998	109.725	6.18	84.5	5.61	2705	2.705	206.453	20.044	28.674	7.4	94.6	5.33	1242	1.242
2018-12-10	1248.13	82.6574	115.567	6.36	79.6	4.44	3120	3.12	792.966	59.6215	110.134	6.65	83.8	3.83	2149	2.149	207.213	20.1178	28.7796	7.46	94.2	5.01	1289	1.289
2018-12-11	1251.3	82.8673	115.861	6.57	82.7	3.85	3220	3.22	795.899	59.842	110.542	6.69	83.3	4.81	2179	2.179	207.964	20.1907	28.8839	7.83	97.8	4.52	1317	1.317
2018-12-12	1254.47	83.0773	116.154	6.68	80.6	5.77	3100	3.1	798.834	60.0627	110.949	6.82	85.1	3.88	2250	2.25	208.715	20.2636	28.9882	7.82	96.5	4.65	1343	1.343
2018-12-13	1257.64	83.2874	116.448	6.29	78.1	5.43	2920	2.92	801.01	60.2263	111.251	6.75	83.2	6.92	2166	2.166	209.47	20.3369	29.0931	8.01	97.9	6.75	1394	1.394
2018-12-14	1260.82	83.4979	116.743	6.37	79.3	4.12	3000	3	803.956	60.4478	111.661	6.75	82.8	6.82	2003	2.003	210.228	20.4105	29.1983	7.67	94.5	7.19	1331	1.331
2018-12-15	1263.99	83.7082	117.036	7.01	85.9	3.92	3070	3.07	806.906	60.6696	112.07	7.11	87	5.74	2058	2.058	210.984	20.4839	29.3033	7.66	95.5	7.01	1347	1.347
2018-12-16	1267.18	83.9189	117.331	7.22	8.9	3.83	3140	3.14	809.863	60.892	112.481	6.97	86.4	3.95	2183	2.183	211.744	20.5577	29.4089	7.67	96.1	6.36	1360	1.36
2018-12-17	1270.36	84.1296	117.626	6.58	81.7	3.5	3210	3.21	812.825	61.1147	112.892	7.04	86.2	5.1	2176	2.176	212.504	20.6315	29.5144	7.54	94.5	7.17	1376	1.376
2018-12-18	1273.53	84.34	117.92	7.09	85.9	3.9	3280	3.28	815.79	61.3376	113.304	7.05	86.2	5.14	2250	2.25	213.268	20.7056	29.6206	7.69	95.8	6.42	1391	1.391
2018-12-19	1276.72	84.5507	118.214	5.41	80.6	3.66	3370	3.37	818.761	61.561	113.717	6.35	79.6	3.5	2400	2.4	214.029	20.7795	29.7263	7.57	94.4	5.75	1408	1.408
2018-12-20	1279.89	84.7613	118.509	6.86	86.4	3.86	3430	3.43	821.734	61.7845	114.13	6.85	84.2	5.06	2370	2.37	214.791	20.8535	29.8321	7.65	95.7	7.26	1428	1.428
2018-12-21	1282.71	84.9478	118.77	6.9	87.1	4.16	3040	3.04	824.708	62.0081	114.543	6.47	82	5.58	2149	2.149	215.554	20.9276	29.9381	8.15	99.8	6.72	1318	1.318
2018-12-22	1285.87	85.157	119.062	6.77	84.1	4.38	3120	3.12	827.686	62.232	114.956	6.66	83.2	3.41	2320	2.32	216.315	21.0015	30.0438	7.58	95	6.18	1344	1.344
2018-12-23	1289.06	85.3684	119.358	6.96	86.6	3.74	3250	3.25	830.684	62.4574	115.373	6.55	81.9	4.01	2320	2.32	217.108	21.0784	30.1539	7.67	96.3	5.98	1364	1.364
2018-12-24	1292.26	85.5798	119.653	7.33	89.6	3.7	3320	3.32	833.697	62.684	115.791	6.95	85.9	5.91	2360	2.36	217.883	21.1537	30.2615	7.9	98	5.36	1386	1.386
2018-12-25	1295.44	85.7911	119.949	7.22	88.5	3.91	3380	3.38	836.683	62.9085	116.206	7.39	89.6	3.93	2460	2.46	218.649	21.2281	30.3679	7.78	96.4	5.55	1418	1.418
2018-12-26	1298.68	86.0055	120.248	7.3	90	3.63	3480	3.48	839.685	63.1342	116.623	6.87	84.7	3.87	2540	2.54	219.432	21.3041	30.4767	8.04	97.9	5.23	1454	1.454
2018-12-27	1301.82	86.2132	120.539	7	86	3.61	3550	3.55	842.659	63.3578	117.036	6.73	83.3	3.82	2580	2.58	220.215	21.3801	30.5854	7.84	96.4	4.3	1476	1.476
2018-12-28	1305.01	86.4243	120.834	5.42	67.7	4.78	3300	3.3	845.657	63.5832	117.452	5.82	72.1	5.94	2390	2.39	220.984	21.4548	30.6922	6.9	85.3	6.53	1389	1.389
2018-12-29	1308.19	86.6354	121.129	6.8	84.6	3.66	3490	3.49	848.661	63.8091	117.87	6.42	80.2	3.88	2490	2.49	221.757	21.5298	30.7996	7.23	91.2	6.18	1421	1.421
2018-12-30	1311.42	86.8487	121.427	6.99	87.4	3.52	3560	3.56	851.676	64.0358	118.288	6.8	84.1	6.08	2520	2.52	222.545	21.6063	30.909	7.71	95.8	4.81	1444	1.444
2018-12-31	1314.62	87.0607	121.724	6.63	81	3.69	3600	3.6	854.705	64.2635	118.709	6.33	84.4	4.31	2570	2.57	223.346	21.6841	31.0203	5.43	71.5	5.91	1426	1.426
2019-01-01	1317.81	87.2725	122.02	6.95	87.2	3.8	3690	3.69	856.044	64.3642	118.895	6.75	84.6	3.76	2710	2.71	224.118	21.759	31.1275	7.43	93.6	6.5	1507	1.507
2019-01-02	1321	87.4834	122.315	7.36	90.2	3.61	2410	2.41	859.065	64.5914	119.315	6.8	82.3	4.87	2400	2.4	224.892	21.8342	31.235	7.57	93.5	7.08	1434	1.434
2019-01-03	1324.19	87.695	122.611	6.87	84.8	5.24	3450	3.45	862.089	64.8187	119.735	6.72	85.9	6.31	2470	2.47	225.669	21.9096	31.3429	7.74	95.4	6.94	1452	1.452
2019-01-04	1327.39	87.907	122.907	7.56	90.4	3.83	3600	3.6	865.128	65.0472	120.157	7.01	85.8	4.55	2520	2.52	226.454	21.9858	31.4519	7.73	95.4	7.73	1459	1.459
2019-01-05	1330.59	88.1187	123.203	7.26	89	3.9	3650	3.65	868.164	65.2755	120.578	6.93	80.3	4.53	2480	2.48	227.237	22.0618	31.5607	7.66	95.8	6.25	1476	1.476
2019-01-06	1333.82	88.3325	123.502	6.44	79.9	3.5	3760	3.76	871.149	65.4999	120.993	6.53	81.6	4.14	2650	2.65	228.026	22.1384	31.6703	7.46	92	5.77	1501	1.501
2019-01-07	1337.02	88.5442	123.798	6.77	82.6	3.77	3820	3.82	874.192	65.7287	121.416	6.62	79.6	4.09	2710	2.71	228.81	22.2146	31.7792	7.61	94.8	5.15	1523	1.523
2019-01-08	1340.22	88.7564	124.095	6.43	81.7	3.64	3950	3.95	877.236	65.9576	121.838	6.26	81	4.57	2730	2.73	229.594	22.2907	31.8881	7.37	94.2	4.32	1567	1.567
2019-01-09	1343.45	88.97	124.393	6.31	79.3	4.07	3980	3.98	880.296	66.1877	122.263	6.45		6.58	2850	2.85	230.401	22.369	32.0001	7.34	93.5	6.81	1602	1.602
