# Supplementary material for: Bacterial community in African catfish (Clarias gariepinus) recirculating aquaculture systems under different stocking densities
Source: Frontiers journal article supplement (doi:10.3389/fmars.2023.1073250), 2023-01-26
Supplement: Table_2.xlsx [file Table_2.xlsx]

## Sheet: S1_VS_S2
Genus	baseMeanLog2	log2FoldChange	padj	Comp
Thiobacillus	12.675	9.4253	0	S1_vs_S2
Sporocytophaga	9.1878	6.455	0	S1_vs_S2
Chryseobacterium	9.6728	4.6853	0	S1_vs_S2
Empedobacter	9.006	6.5453	0	S1_vs_S2
Iamia	10.696	2.9449	0	S1_vs_S2
Pseudopedobacter	10.007	3.1879	0	S1_vs_S2
Rheinheimera	11.672	3.9495	0	S1_vs_S2
Geothrix	7.9363	4.7728	0	S1_vs_S2
Singulisphaera	12.014	3.1515	2.1344e-10	S1_vs_S2
Corallomonas	8.0105	4.5658	3.1108e-10	S1_vs_S2
Stenotrophomonas	7.6593	4.6345	1.5723e-09	S1_vs_S2
Arcobacter	8.8599	2.4757	4.4149e-09	S1_vs_S2
Thiohalobacter	9.7367	2.6061	4.4149e-09	S1_vs_S2
Asticcacaulis	7.8031	4.2711	1.0247e-08	S1_vs_S2
Labrys	8.7245	3.0446	1.0293e-08	S1_vs_S2
Acidisphaera	7.6242	4.2676	1.3542e-08	S1_vs_S2
Rhodococcus	7.5376	4.4277	1.5298e-08	S1_vs_S2
Laribacter	8.028	4.0351	1.9035e-08	S1_vs_S2
Acidothermus	8.6332	3.0809	3.5436e-08	S1_vs_S2
Kerstersia	8.0534	3.7482	6.6787e-08	S1_vs_S2
Mucilaginibacter	7.4157	4.215	8.7873e-08	S1_vs_S2
Aquincola	7.8856	4.3161	9.1309e-08	S1_vs_S2
Desulfurivibrio	8.0563	3.4877	9.5139e-08	S1_vs_S2
Vasilyevaea	8.5585	2.8866	1.2116e-07	S1_vs_S2
Massilia	8.2829	3.8224	1.5865e-07	S1_vs_S2
Rivicola	7.6744	3.7138	1.8281e-07	S1_vs_S2
Halocalculus	7.5256	4.0869	4.0974e-07	S1_vs_S2
Labedaea	7.4727	3.9742	4.6558e-07	S1_vs_S2
WPS_2_genera_incertae_sedis	7.345	4.0781	8.3461e-07	S1_vs_S2
Dongia	8.9223	2.9863	8.6578e-07	S1_vs_S2
Bacteriovorax	7.1548	3.6944	1.8787e-06	S1_vs_S2
Paenibacillus	7.8743	3.7	1.8787e-06	S1_vs_S2
Paraperlucidibaca	7.353	3.7689	1.8787e-06	S1_vs_S2
Thermofilum	7.162	3.7136	1.8787e-06	S1_vs_S2
Humibacter	9.7231	2.282	2.4322e-06	S1_vs_S2
Jonesia	7.6034	3.8338	2.6573e-06	S1_vs_S2
Dietzia	7.3217	3.6744	2.919e-06	S1_vs_S2
Chitiniphilus	7.2395	3.8665	9.9816e-06	S1_vs_S2
Terrimonas	9.0638	2.6363	1.1035e-05	S1_vs_S2
Varibaculum	7.1769	3.4287	1.2802e-05	S1_vs_S2
Parasegetibacter	10.19	2.3721	1.5509e-05	S1_vs_S2
Sphingobacterium	9.4195	2.8476	1.5522e-05	S1_vs_S2
Alkanindiges	7.9725	4.5382	2.1174e-05	S1_vs_S2
Serpens	9.2276	2.1885	2.1174e-05	S1_vs_S2
Senegalimassilia	6.9523	3.2284	3.9266e-05	S1_vs_S2
Eggerthia	6.9802	3.2771	5.9351e-05	S1_vs_S2
Acetothermia_genera_incertae_sedis	6.9462	3.2151	6.8262e-05	S1_vs_S2
Brevinema	7.7285	2.9674	7.2214e-05	S1_vs_S2
Fibrisoma	7.0639	3.1609	7.6675e-05	S1_vs_S2
Gaiella	7.7566	2.9537	7.997e-05	S1_vs_S2
Methylococcus	7.4264	2.7578	0.0001018	S1_vs_S2
Leadbetterella	7.2392	3.8802	0.00010574	S1_vs_S2
Calditerrivibrio	6.9247	3.1489	0.00011447	S1_vs_S2
Chitinophaga	6.9614	3.2261	0.00011719	S1_vs_S2
Marinithermus	7.0486	3.1225	0.00011719	S1_vs_S2
Arachidicoccus	8.4908	2.2612	0.000129	S1_vs_S2
Sandarakinorhabdus	7.7209	2.9574	0.00014704	S1_vs_S2
Lentilitoribacter	6.8707	2.9959	0.00020071	S1_vs_S2
Thiomonas	6.8829	3.0303	0.00022209	S1_vs_S2
Stygiolobus	6.8283	2.9214	0.0003133	S1_vs_S2
Brevibacterium	7.202	2.7641	0.00034676	S1_vs_S2
Arthrobacter	7.2328	2.7766	0.00036785	S1_vs_S2
Coxiella	7.5604	2.5948	0.00041674	S1_vs_S2
Biostraticola	6.8157	2.8853	0.00044913	S1_vs_S2
Rhodanobacter	14.283	2.8452	0.00047425	S1_vs_S2
Dichelobacter	7.2612	2.4867	0.00065335	S1_vs_S2
Brevundimonas	6.769	2.7124	0.000966	S1_vs_S2
Thermocladium	6.741	2.6509	0.0012847	S1_vs_S2
Proteiniphilum	6.7998	2.7903	0.0013273	S1_vs_S2
Terriglobus	9.4431	2.3594	0.0015557	S1_vs_S2
Sulfuritalea	6.8571	2.5717	0.0016933	S1_vs_S2
Acidipila	7.7215	2.0614	0.0018425	S1_vs_S2
Sphaerobacter	9.5863	2.0107	0.0019313	S1_vs_S2
Rubrivivax	6.8183	2.5339	0.0021678	S1_vs_S2
Phyllobacterium	7.1708	2.0222	0.0053897	S1_vs_S2
Heliobacillus	6.7379	2.2983	0.005489	S1_vs_S2
Omnitrophica_genera_incertae_sedis	9.7581	2.5327	0.006833	S1_vs_S2
Ectothiorhodosinus	6.8542	2.1899	0.0075145	S1_vs_S2
Metallibacterium	12.197	2.0418	0.008045	S1_vs_S2
Chitinibacter	7.1683	2.0611	0.012959	S1_vs_S2
Bordetella	6.8257	2.8891	0.024309	S1_vs_S2
Armatimonadetes_gp5	12.062	2.3667	0.047116	S1_vs_S2

## Sheet: S1_vs_S3
name	baseMeanLog2	log2FoldChange	padj	Comp
Telmatobacter	9.5218	3.1641	0.039216	S1_vs_S3
Elusimicrobium	10.039	3.1674	0.039216	S1_vs_S3
Beggiatoa	9.3142	2.8644	0.039216	S1_vs_S3
Thermodesulforhabdus	8.6239	2.7724	0.042092	S1_vs_S3
Sorangium	8.3991	2.4596	0.045024	S1_vs_S3
Fangia	8.3896	2.6306	0.045024	S1_vs_S3
Ferroplasma	9.4517	2.8699	0.045024	S1_vs_S3
Bangiophyceae	8.0897	2.3625	0.045024	S1_vs_S3
Thermomarinilinea	7.9257	2.6929	0.046319	S1_vs_S3
ZB3_genera_incertae_sedis	8.628	2.5259	0.049644	S1_vs_S3
Thiovirga	7.8234	2.2813	0.049644	S1_vs_S3
Microgenomates_genera_incertae_sedis	9.2706	2.5621	0.049892	S1_vs_S3

## Sheet: S2_vs_S3
Genera	padj	log2FoldChange	baseMeanLog2	Comp
Limnohabitans	0	9.1857	14.554	S2_vs_S3
Amorphus	0	10.923	13.342	S2_vs_S3
Fontimonas	0	9.9404	11.17	S2_vs_S3
Saccharibacillus	0	12.346	13.485	S2_vs_S3
Novosphingobium	0	8.8213	15.993	S2_vs_S3
Cerasicoccus	0	4.0157	11.735	S2_vs_S3
Pseudoclavibacter	0	10.119	11.531	S2_vs_S3
Bdellovibrio	0	8.6534	12.772	S2_vs_S3
Terracoccus	0	15.377	17.167	S2_vs_S3
Chitinibacter	0	4.4156	11.058	S2_vs_S3
Vampirovibrio	0	4.1206	11.019	S2_vs_S3
Segetibacter	0	4.8925	12.365	S2_vs_S3
Wolinella	0	7.5787	9.0851	S2_vs_S3
Chryseolinea	0	7.8423	9.6641	S2_vs_S3
Simkania	0	5.7599	11.271	S2_vs_S3
Brevifollis	0	3.7339	9.1419	S2_vs_S3
Haliscomenobacter	0	6.3124	10.625	S2_vs_S3
Pseudobacteriovorax	0	4.1552	11.082	S2_vs_S3
Paucimonas	0	5.0213	10.265	S2_vs_S3
Lacibacterium	0	6.0558	8.0571	S2_vs_S3
Runella	0	6.5805	8.1536	S2_vs_S3
Formivibrio	0	6.5272	8.1747	S2_vs_S3
Luteimonas	0	8.0989	11.753	S2_vs_S3
Methyloceanibacter	0	7.5594	9.38	S2_vs_S3
Azohydromonas	0	4.5868	9.3261	S2_vs_S3
Nitratifractor	1.2336e-10	10.425	12.222	S2_vs_S3
Magnetospirillum	1.5953e-10	8.7736	10.295	S2_vs_S3
Skermania	4.2949e-10	5.6334	7.4773	S2_vs_S3
Chloroherpeton	8.3472e-10	9.1424	10.622	S2_vs_S3
Jahnella	1.0368e-09	6.5722	8.3247	S2_vs_S3
Woesearchaeota_Incertae_Sedis_AR15	1.5464e-09	6.4946	8.6632	S2_vs_S3
Puniceicoccus	1.6022e-09	4.5392	11.149	S2_vs_S3
Dehalospirillum	1.8269e-09	8.4693	9.9772	S2_vs_S3
Povalibacter	2.4077e-09	2.6497	8.8531	S2_vs_S3
Luteolibacter	4.4758e-09	3.5822	11.582	S2_vs_S3
Cucumibacter	9.6005e-09	6.2277	8.0292	S2_vs_S3
Ferroglobus	9.6005e-09	9.7559	11.228	S2_vs_S3
Telmatospirillum	9.6005e-09	8.609	10.154	S2_vs_S3
Anaeromyxobacter	1.105e-08	8.8598	10.429	S2_vs_S3
Kerstersia	1.4921e-08	6.1934	14.562	S2_vs_S3
Persicirhabdus	2.2529e-08	7.163	8.7666	S2_vs_S3
Gp16	2.6889e-08	5.0206	7.1425	S2_vs_S3
Lewinella	2.7434e-08	9.9344	11.481	S2_vs_S3
Gemmata	3.8886e-08	8.3949	9.9764	S2_vs_S3
Filimonas	4.392e-08	8.4155	10.007	S2_vs_S3
Phycisphaera	5.558e-08	8.0264	9.5649	S2_vs_S3
Roseomonas	5.8337e-08	6.3506	7.7529	S2_vs_S3
Elusimicrobium	6.3218e-08	8.93	10.422	S2_vs_S3
Postechiella	6.9633e-08	5.0509	7.603	S2_vs_S3
Beggiatoa	9.2274e-08	8.2986	9.829	S2_vs_S3
Citreitalea	1.0252e-07	7.8197	9.3828	S2_vs_S3
Pirellula	1.0717e-07	6.2841	8.04	S2_vs_S3
Candidatus_Anammoxoglobus	1.3836e-07	6.9447	8.6344	S2_vs_S3
Tepidisphaera	2.0316e-07	6.609	8.3602	S2_vs_S3
Ferroplasma	2.0536e-07	8.3508	9.8681	S2_vs_S3
Aeriscardovia	2.069e-07	6.9667	8.6417	S2_vs_S3
Thiogranum	2.2574e-07	7.8145	9.373	S2_vs_S3
Oleiphilus	2.278e-07	6.9737	8.6215	S2_vs_S3
Methylovirgula	2.4988e-07	6.8354	8.5158	S2_vs_S3
Oceanibacterium	2.5526e-07	5.3754	7.4142	S2_vs_S3
Gemmobacter	3.3708e-07	3.5937	8.9574	S2_vs_S3
Telmatobacter	4.0811e-07	8.2688	9.7713	S2_vs_S3
Thiobacter	4.0811e-07	6.2244	8.0225	S2_vs_S3
Limnobacter	4.9182e-07	6.4891	8.266	S2_vs_S3
Dissulfuribacter	5.4951e-07	6.9184	8.5637	S2_vs_S3
Sphingopyxis	5.6671e-07	5.4874	7.4241	S2_vs_S3
Breoghania	6.3956e-07	5.0746	7.2159	S2_vs_S3
Melittangium	6.9874e-07	6.0544	7.9062	S2_vs_S3
Dasania	7.1374e-07	5.9158	7.8299	S2_vs_S3
Rubritepida	9.2367e-07	6.9637	8.6064	S2_vs_S3
Marinicauda	1.0474e-06	5.6141	7.5825	S2_vs_S3
Rubellimicrobium	1.0527e-06	5.9317	7.8569	S2_vs_S3
Methyloversatilis	1.0874e-06	6.4582	8.2076	S2_vs_S3
Blastochloris	1.3189e-06	2.1559	8.2186	S2_vs_S3
Peredibacter	1.3559e-06	7.3365	8.8994	S2_vs_S3
Labilithrix	1.3678e-06	7.3316	8.9866	S2_vs_S3
Bangiophyceae	1.4274e-06	6.8233	8.4632	S2_vs_S3
ZB3_genera_incertae_sedis	1.6528e-06	7.079	8.6855	S2_vs_S3
Ardenticatena	1.7133e-06	5.414	7.2068	S2_vs_S3
Sorangium	1.8127e-06	6.998	8.6335	S2_vs_S3
Rhodopila	1.8765e-06	5.9515	7.7299	S2_vs_S3
Haliea	2.1279e-06	6.6367	8.6708	S2_vs_S3
Chiayiivirga	2.7155e-06	5.5174	7.6791	S2_vs_S3
Thiovirga	3.008e-06	6.4407	8.1552	S2_vs_S3
Pelolinea	3.0291e-06	6.6964	8.4416	S2_vs_S3
Lishizhenia	3.4252e-06	5.6386	7.5337	S2_vs_S3
Methanomassiliicoccus	3.7754e-06	6.5711	8.2541	S2_vs_S3
Larsenimonas	3.8747e-06	6.7857	8.4328	S2_vs_S3
Prosthecobacter	4.163e-06	6.2705	8.1055	S2_vs_S3
Rhodoblastus	4.4546e-06	5.4272	7.4813	S2_vs_S3
Thermodesulforhabdus	4.8833e-06	6.6485	8.3136	S2_vs_S3
Ktedonobacter	4.953e-06	8.9668	10.526	S2_vs_S3
Bradymonas	5.1883e-06	6.0006	7.8943	S2_vs_S3
Permianibacter	5.1893e-06	2.5272	8.0722	S2_vs_S3
Thermoflavifilum	5.3946e-06	6.2497	7.9986	S2_vs_S3
Caulobacter	5.4013e-06	6.4599	8.2759	S2_vs_S3
Thermotalea	5.4355e-06	6.9705	8.5846	S2_vs_S3
Phaselicystis	5.8468e-06	4.2529	6.9715	S2_vs_S3
Mangroviflexus	5.847e-06	2.9435	9.039	S2_vs_S3
Haliangium	6.1236e-06	6.5718	8.3583	S2_vs_S3
Ignavibacterium	7.011e-06	5.8912	7.8119	S2_vs_S3
Glaciimonas	7.3636e-06	6.0499	8.1528	S2_vs_S3
Paucibacter	7.6097e-06	6.1641	7.9378	S2_vs_S3
Sphingorhabdus	8.6319e-06	5.2575	7.3836	S2_vs_S3
Chthonomonas_Armatimonadetes_gp3	1.0559e-05	6.1306	8.0115	S2_vs_S3
Niveispirillum	1.0587e-05	6.2994	8.0173	S2_vs_S3
Phreatobacter	1.0857e-05	6.1271	8.028	S2_vs_S3
Desulfovirga	1.169e-05	4.9873	7.1749	S2_vs_S3
Rhodocytophaga	1.1698e-05	6.7684	8.3952	S2_vs_S3
Litoribacillus	1.576e-05	2.5417	10.013	S2_vs_S3
Robiginitomaculum	1.7988e-05	6.2174	7.9532	S2_vs_S3
Mitsuaria	2.0022e-05	5.8705	7.7129	S2_vs_S3
Solitalea	2.1214e-05	5.3351	7.3684	S2_vs_S3
Caldimonas	2.1887e-05	3.4478	7.3616	S2_vs_S3
Spartobacteria_genera_incertae_sedis	2.3617e-05	6.6326	8.2783	S2_vs_S3
Woesearchaeota_Incertae_Sedis_AR20	2.4156e-05	5.5976	7.5049	S2_vs_S3
Candidatus_Solibacter	3.0436e-05	6.1276	7.8909	S2_vs_S3
Vulgatibacter	3.1245e-05	3.9077	8.9408	S2_vs_S3
Silanimonas	3.7432e-05	2.9866	7.7117	S2_vs_S3
Dichotomicrobium	3.7836e-05	5.8782	7.7051	S2_vs_S3
Salimesophilobacter	4.4967e-05	4.8742	7.1022	S2_vs_S3
Lacibacter	5.4658e-05	6.9216	8.646	S2_vs_S3
Anderseniella	7.1602e-05	6.2664	8.1186	S2_vs_S3
Lysobacter	9.0246e-05	2.899	8.3247	S2_vs_S3
Roseimicrobium	9.6291e-05	6.2889	8.1586	S2_vs_S3
Gp4	0.00013971	4.7659	7.1228	S2_vs_S3
Rubinisphaera	0.00014162	6.1374	8.0198	S2_vs_S3
Rhizobium	0.00015786	5.2707	7.3941	S2_vs_S3
Nereida	0.00016609	5.7547	7.752	S2_vs_S3
Desulfurispora	0.00017624	5.3213	7.4593	S2_vs_S3
Ornatilinea	0.0001916	5.4964	7.549	S2_vs_S3
Hydrotalea	0.00019483	5.1762	7.3439	S2_vs_S3
Rhodopirellula	0.00020042	5.4366	7.5267	S2_vs_S3
Aridibacter	0.00022634	5.0893	7.2841	S2_vs_S3
Elizabethkingia	0.00022808	4.0744	10.439	S2_vs_S3
Rhodobium	0.00022814	5.0719	7.2411	S2_vs_S3
Thermomarinilinea	0.00035159	6.4788	8.166	S2_vs_S3
Pseudonocardia	0.00050716	2.5389	7.7436	S2_vs_S3
Niastella	0.0014309	4.3002	8.9865	S2_vs_S3
Paracoccus	0.010075	3.5599	7.5731	S2_vs_S3
Citreicella	0.012367	2.2276	11.427	S2_vs_S3
Pedobacter	0.036358	2.7804	9.4186	S2_vs_S3
